# Supplementary material for: Effects of narrow linear clearings on movement and habitat use in a boreal forest mammal community during winter
Source: PeerJ. 2019 Feb 25;7:e6504. doi: 10.7717/peerj.6504 (PMC6394345; doi:10.7717/peerj.6504)
Supplement: Supplemental Information 1 [file peerj-07-6504-s001.xlsx]

## Sheet: Data
Site_no	SL_FO	Sub_trn	TYPE_CD	bc	cu	cy	de	fi	gb	gw	ha	ly	ma	mo_ek	mu	rf	rs	sh	vo	we
1	FO	ST_1	A	0	0	0	1	0	0	0	0	0	3	0	1	0	4	0	0	0
1	FO	ST_1	C	0	0	2	10	0	0	0	2	0	31	0	6	0	205	0	7	0
1	FO	ST_10	A	0	0	0	1	0	0	0	0	0	0	0	1	0	6	3	6	0
1	FO	ST_10	C	0	1	1	47	0	0	0	0	0	22	3	1	0	171	0	3	0
1	FO	ST_2	A	0	0	0	1	0	0	0	0	0	0	0	0	0	6	0	0	0
1	FO	ST_2	C	0	0	3	17	0	0	0	0	0	27	0	3	0	165	0	1	0
1	FO	ST_3	A	0	0	0	5	0	0	0	0	0	3	0	0	0	10	0	0	0
1	FO	ST_3	C	0	0	0	39	0	0	0	0	0	20	0	0	0	212	0	0	0
1	FO	ST_4	A	0	0	0	3	0	0	0	0	0	0	0	2	0	8	0	1	0
1	FO	ST_4	C	0	0	0	44	0	0	0	3	0	9	0	1	1	197	0	0	1
1	FO	ST_5	A	0	0	0	1	0	0	0	0	0	1	0	0	0	3	0	0	0
1	FO	ST_5	C	0	0	0	24	0	0	0	5	0	4	2	0	0	32	0	3	0
1	FO	ST_6	A	0	0	0	0	0	0	0	1	0	0	0	1	0	8	0	3	0
1	FO	ST_6	C	0	1	2	43	0	0	0	1	0	13	0	7	0	187	2	1	0
1	FO	ST_7	A	0	0	0	0	0	0	0	0	0	2	0	2	0	3	0	2	0
1	FO	ST_7	C	0	1	4	18	0	0	0	0	0	23	0	17	0	130	0	6	0
1	FO	ST_8	A	0	0	0	3	0	0	0	0	0	4	0	0	0	1	0	0	0
1	FO	ST_8	C	0	2	1	47	0	0	0	0	0	28	0	2	0	171	2	8	0
1	FO	ST_9	A	0	0	0	4	0	0	0	0	0	0	0	0	0	3	1	0	0
1	FO	ST_9	C	0	0	5	47	0	0	0	2	0	17	1	4	0	189	0	0	0
1	Sl	ST_1	A	0	0	0	2	0	0	0	0	0	1	0	0	0	6	0	1	0
1	SL	ST_1	C	0	1	0	13	0	0	0	0	0	15	0	4	0	137	2	4	1
1	SL	ST_10	A	0	0	0	1	0	0	0	4	0	1	0	0	0	3	0	0	0
1	SL	ST_10	C	0	0	2	30	0	0	0	3	0	15	0	0	0	86	0	0	0
1	SL	ST_2	A	0	0	0	2	0	0	0	0	0	3	0	0	0	9	2	3	0
1	SL	ST_2	C	0	0	0	15	0	0	0	4	0	8	0	4	0	64	0	0	0
1	SL	ST_3	A	0	0	0	3	0	0	0	0	0	1	0	0	0	2	0	3	0
1	SL	ST_3	C	0	0	4	22	0	0	0	0	0	3	4	9	0	42	0	3	0
1	SL	ST_4	A	0	0	0	5	0	0	0	0	0	0	0	0	0	4	0	0	0
1	SL	ST_4	C	0	0	4	19	0	0	0	0	0	7	0	0	0	22	0	1	0
1	SL	ST_5	A	0	0	0	7	0	0	0	2	0	1	0	0	0	8	0	0	0
1	SL	ST_5	C	0	0	0	33	0	0	0	6	0	6	0	0	0	68	0	5	0
1	SL	ST_6	A	0	0	0	4	0	0	0	2	0	0	0	1	0	6	0	0	0
1	SL	ST_6	C	0	0	4	21	0	0	0	5	0	12	3	4	0	56	0	1	0
1	SL	ST_7	A	0	0	0	8	0	0	0	1	0	3	0	1	0	6	0	0	0
1	SL	ST_7	C	0	0	1	39	0	0	0	7	0	13	0	8	0	28	0	1	0
1	SL	ST_8	A	0	0	0	7	0	0	0	0	0	1	1	0	0	0	0	0	0
1	SL	ST_8	C	0	0	3	46	0	0	0	7	0	7	0	1	0	17	0	4	0
1	SL	ST_9	A	0	0	0	2	0	0	0	2	0	2	0	0	0	2	0	0	0
1	SL	ST_9	C	0	0	9	22	0	0	0	12	0	29	1	8	1	33	0	0	0
2	FO	ST_1	A	0	0	0	0	0	0	0	0	0	3	1	0	0	1	0	1	0
2	FO	ST_1	C	0	0	0	23	0	0	0	0	0	8	10	3	0	17	0	4	0
2	FO	ST_10	A	0	0	0	0	0	0	0	0	0	2	0	0	0	0	0	1	0
2	FO	ST_10	C	0	0	0	18	0	0	0	0	0	8	2	0	0	19	0	4	0
2	FO	ST_2	A	0	0	0	0	0	0	0	0	0	1	0	6	0	0	0	3	0
2	FO	ST_2	C	0	0	0	9	0	0	0	0	0	10	3	3	0	1	0	5	0
2	FO	ST_3	A	0	0	0	0	0	0	0	0	0	2	1	2	0	0	1	3	0
2	FO	ST_3	C	0	0	0	28	0	0	0	0	0	10	7	5	0	5	0	2	0
2	FO	ST_4	A	0	0	0	0	0	0	0	0	0	2	1	0	0	0	3	4	0
2	FO	ST_4	C	0	0	0	26	0	0	0	1	0	19	8	1	0	1	0	0	0
2	FO	ST_5	A	0	0	0	2	0	0	0	0	0	0	0	0	0	0	0	3	0
2	FO	ST_5	C	0	0	0	43	0	0	0	1	0	11	4	3	0	12	0	0	0
2	FO	ST_6	A	0	0	0	3	0	0	0	0	0	1	0	0	0	0	0	0	0
2	FO	ST_6	C	0	0	2	19	0	0	0	4	0	7	5	0	0	7	0	3	0
2	FO	ST_7	A	0	0	0	2	0	0	0	0	0	0	0	0	0	0	0	1	0
2	FO	ST_7	C	0	0	0	39	0	0	0	0	0	5	0	0	0	22	2	4	0
2	FO	ST_8	A	0	0	0	2	0	0	0	0	0	0	0	0	0	0	0	0	0
2	FO	ST_8	C	0	1	0	31	0	0	0	0	2	2	0	0	0	2	0	0	1
2	FO	ST_9	A	0	0	0	4	0	0	0	0	0	3	0	0	0	3	0	0	0
2	FO	ST_9	C	0	0	1	27	0	0	0	0	0	4	0	0	0	22	0	0	0
2	Sl	ST_1	A	0	0	0	1	0	0	0	0	0	0	1	0	0	5	0	0	0
2	SL	ST_1	C	0	0	1	33	0	0	0	0	1	6	2	0	0	16	2	0	0
2	SL	ST_10	A	0	0	0	0	0	0	0	0	0	0	0	0	0	1	0	0	0
2	SL	ST_10	C	0	0	5	11	0	0	0	0	0	2	0	0	0	28	0	0	1
2	SL	ST_2	A	0	0	0	1	0	0	0	0	0	0	1	0	0	0	0	0	0
2	SL	ST_2	C	0	0	0	31	0	0	0	2	0	4	8	1	0	0	1	0	0
2	SL	ST_3	A	0	0	0	1	0	0	0	0	0	0	0	1	0	3	0	0	0
2	SL	ST_3	C	0	0	0	10	0	0	0	0	0	4	2	0	0	37	0	1	0
2	SL	ST_4	A	0	0	0	0	0	0	0	0	0	1	0	0	0	2	0	0	0
2	SL	ST_4	C	0	0	0	16	0	0	0	0	0	14	1	3	0	62	0	0	0
2	SL	ST_5	A	0	0	0	0	0	0	0	0	0	0	0	0	0	1	0	0	0
2	SL	ST_5	C	0	0	0	19	0	0	0	0	0	7	0	0	0	69	0	5	0
2	SL	ST_6	A	0	0	0	0	0	0	0	0	0	3	1	0	0	1	0	0	0
2	SL	ST_6	C	0	0	0	10	0	0	0	0	0	7	4	0	0	41	0	0	0
2	SL	ST_7	A	0	0	0	0	0	0	0	0	0	0	0	0	0	0	0	3	0
2	SL	ST_7	C	0	0	2	18	0	0	0	0	0	4	1	0	0	5	0	3	0
2	SL	ST_8	C	0	0	0	16	0	0	0	0	0	5	0	2	0	22	0	14	0
2	SL	ST_9	A	0	0	0	0	0	0	0	0	0	1	0	0	0	0	0	0	0
2	SL	ST_9	C	1	0	1	30	0	0	0	0	0	8	2	0	0	7	0	7	0
3	FO	ST_1	A	0	0	0	2	0	0	0	2	0	1	0	0	0	0	1	1	0
3	FO	ST_1	C	0	0	4	36	0	0	0	39	0	5	17	5	0	1	4	21	1
3	FO	ST_10	A	0	0	0	1	0	0	0	0	0	0	0	3	0	0	1	2	0
3	FO	ST_10	C	0	0	0	24	1	0	0	17	1	13	10	0	0	4	6	6	4
3	FO	ST_2	A	0	0	0	0	0	0	0	1	0	4	0	1	0	1	0	0	0
3	FO	ST_2	C	0	0	3	52	0	0	0	6	0	7	10	8	0	11	2	6	0
3	FO	ST_3	A	0	0	0	1	0	0	0	0	0	0	0	1	0	1	1	3	0
3	FO	ST_3	C	0	2	5	61	0	0	0	0	0	13	2	1	3	9	11	3	0
3	FO	ST_4	A	0	0	1	0	0	0	0	0	0	1	0	0	0	0	1	1	0
3	FO	ST_4	C	0	0	8	55	0	0	0	5	0	14	8	1	1	0	2	11	0
3	FO	ST_5	A	0	0	2	0	0	0	0	0	0	1	0	1	0	0	1	1	0
3	FO	ST_5	C	0	0	4	28	0	0	0	32	0	12	5	9	0	0	8	7	0
3	FO	ST_6	A	0	0	0	1	0	0	0	0	0	0	0	3	0	0	3	1	0
3	FO	ST_6	C	0	0	0	25	0	0	0	5	1	3	3	14	0	2	10	3	0
3	FO	ST_7	A	0	0	0	1	0	0	0	0	0	0	0	0	0	0	0	0	0
3	FO	ST_7	C	0	1	2	42	0	0	0	1	0	3	2	5	1	13	1	11	2
3	FO	ST_8	A	0	0	0	2	0	0	0	0	0	0	0	0	0	0	1	0	1
3	FO	ST_8	C	0	0	3	24	0	0	0	11	0	7	10	3	0	4	1	10	6
3	FO	ST_9	A	0	0	0	0	0	0	0	1	0	0	1	3	0	0	3	4	1
3	FO	ST_9	C	0	0	3	27	0	0	0	47	0	5	4	1	0	0	0	4	13
3	Sl	ST_1	A	0	0	0	0	0	0	0	0	0	0	1	0	0	1	0	2	1
3	SL	ST_1	C	0	0	2	15	0	0	0	0	0	1	3	4	0	6	7	10	3
3	SL	ST_10	A	0	0	0	1	0	0	0	0	0	0	0	1	0	0	0	0	0
3	SL	ST_10	C	0	0	0	20	0	0	0	0	0	1	4	1	0	9	0	0	0
3	SL	ST_2	A	0	0	0	0	0	0	0	0	0	0	0	3	0	0	0	6	0
3	SL	ST_2	C	0	0	1	10	0	0	0	2	0	2	0	5	1	12	3	5	1
3	SL	ST_3	A	0	0	0	2	0	0	0	3	0	1	0	8	0	2	0	6	0
3	SL	ST_3	C	0	1	2	28	0	0	0	7	0	0	6	7	0	0	3	3	3
3	SL	ST_4	A	0	0	0	2	0	0	0	0	0	0	0	3	0	0	0	0	0
3	SL	ST_4	C	0	0	2	34	0	0	0	2	0	3	2	7	0	3	3	2	0
3	SL	ST_5	A	0	0	0	4	0	0	0	1	0	0	0	0	0	0	0	6	0
3	SL	ST_5	C	0	0	1	27	0	0	0	9	0	5	0	14	0	18	1	2	0
3	SL	ST_6	A	0	0	0	1	0	0	0	0	0	1	0	6	0	0	0	0	0
3	SL	ST_6	C	0	1	0	17	0	0	0	2	1	8	4	25	0	8	3	4	0
3	SL	ST_7	A	0	0	0	0	0	0	0	0	0	0	0	0	0	1	0	1	0
3	SL	ST_7	C	0	0	2	20	0	0	0	2	0	1	3	4	0	14	2	2	0
3	SL	ST_8	A	0	0	0	1	0	0	0	0	0	0	0	0	0	0	0	1	0
3	SL	ST_8	C	0	0	0	9	0	0	0	1	0	1	4	5	0	6	0	9	0
3	SL	ST_9	A	0	0	0	2	0	0	0	0	0	1	0	2	0	0	0	5	0
3	SL	ST_9	C	0	1	0	13	0	0	0	0	0	4	1	3	0	1	4	4	0
4	FO	ST_1	A	0	0	0	0	0	0	0	0	0	1	0	0	0	5	0	1	0
4	FO	ST_1	C	0	0	2	5	0	0	0	1	0	4	4	0	0	321	0	4	1
4	FO	ST_10	A	0	0	0	2	0	0	0	0	0	0	0	3	0	0	17	0	0
4	FO	ST_10	C	0	0	0	23	0	0	0	1	0	2	0	0	0	33	16	3	1
4	FO	ST_2	A	0	0	1	0	0	0	0	0	0	0	2	6	0	6	0	1	0
4	FO	ST_2	C	0	0	2	6	0	0	0	0	0	2	0	4	0	224	0	1	0
4	FO	ST_3	A	0	0	0	1	0	0	0	0	0	0	0	0	0	8	0	0	0
4	FO	ST_3	C	0	0	1	14	0	0	0	0	0	6	1	3	0	229	0	2	0
4	FO	ST_4	A	0	0	0	1	0	0	0	0	0	0	0	0	0	7	0	0	0
4	FO	ST_4	C	0	0	0	24	0	0	1	2	0	0	0	2	0	210	0	0	0
4	FO	ST_5	A	0	0	0	0	0	0	0	0	0	0	0	3	0	14	0	0	0
4	FO	ST_5	C	0	0	0	18	0	0	0	0	0	11	0	1	0	279	3	1	0
4	FO	ST_6	A	0	0	0	4	0	0	0	0	0	1	0	2	0	2	1	2	0
4	FO	ST_6	C	0	0	0	30	0	0	0	0	0	15	0	0	0	216	1	3	0
4	FO	ST_7	A	0	0	0	1	0	0	0	0	0	0	0	1	0	3	0	0	0
4	FO	ST_7	C	0	0	0	10	0	0	0	0	0	7	1	2	0	172	0	1	0
4	FO	ST_8	A	0	0	0	1	0	0	0	0	0	1	0	3	0	0	0	0	0
4	FO	ST_8	C	0	0	0	24	0	0	0	0	0	9	0	4	0	267	4	3	0
4	FO	ST_9	A	0	0	0	1	0	0	0	0	0	0	0	0	0	2	3	0	1
4	FO	ST_9	C	2	0	0	32	0	0	0	3	0	6	0	5	0	161	5	1	0
4	Sl	ST_1	A	0	0	0	0	0	0	0	0	0	0	0	1	0	9	0	0	1
4	SL	ST_1	C	0	0	3	4	0	0	0	4	0	3	0	4	1	91	0	20	2
4	SL	ST_10	A	0	0	0	2	0	0	0	2	0	0	0	0	0	3	0	0	0
4	SL	ST_10	C	0	0	0	11	0	0	0	8	1	0	1	0	0	56	1	7	2
4	SL	ST_2	A	0	0	0	1	0	0	0	1	0	0	0	1	0	5	0	0	0
4	SL	ST_2	C	0	0	2	4	1	0	0	0	0	0	3	1	0	113	9	0	4
4	SL	ST_3	A	0	0	0	0	0	0	0	0	0	0	0	0	0	4	0	0	0
4	SL	ST_3	C	0	0	0	11	0	0	0	1	0	2	0	0	0	176	3	1	2
4	SL	ST_4	A	0	0	0	0	0	0	0	0	0	0	0	0	0	11	0	0	1
4	SL	ST_4	C	0	0	0	16	0	0	0	12	1	0	1	2	0	110	2	0	0
4	SL	ST_5	A	0	0	0	0	0	0	0	0	0	0	0	0	0	7	0	1	0
4	SL	ST_5	C	0	0	1	7	0	0	0	0	0	0	0	0	0	151	4	3	0
4	SL	ST_6	A	0	0	0	1	0	0	0	0	0	1	0	0	0	7	0	1	0
4	SL	ST_6	C	0	0	1	21	0	0	0	0	0	3	0	0	0	66	0	0	1
4	SL	ST_7	A	0	0	1	3	0	0	0	0	0	2	0	1	0	3	0	0	0
4	SL	ST_7	C	0	0	3	15	0	0	0	0	0	1	1	1	0	118	6	0	0
4	SL	ST_8	A	0	0	0	2	0	0	0	0	0	0	0	0	0	7	0	1	0
4	SL	ST_8	C	0	0	0	18	0	0	0	0	0	0	0	1	0	92	4	0	1
4	SL	ST_9	A	0	0	0	0	0	0	0	4	0	0	0	0	0	1	1	0	0
4	SL	ST_9	C	0	0	1	13	0	0	0	9	0	2	1	0	0	66	2	1	2
5	FO	ST_1	A	0	0	0	2	0	0	0	0	0	0	0	0	0	1	0	6	0
5	FO	ST_1	C	0	0	2	181	0	0	0	0	0	19	7	0	0	66	8	0	0
5	FO	ST_10	A	0	0	0	0	0	0	0	0	0	0	0	0	0	5	2	3	0
5	FO	ST_10	C	0	0	1	35	0	0	2	0	0	11	2	0	0	95	9	0	0
5	FO	ST_2	A	0	0	0	2	0	0	0	0	0	0	0	0	0	5	0	0	0
5	FO	ST_2	C	0	0	3	59	0	0	0	0	0	2	1	3	1	70	2	0	0
5	FO	ST_3	A	0	0	0	1	0	0	0	0	0	0	0	0	0	3	3	0	0
5	FO	ST_3	C	0	1	1	64	0	0	0	0	0	8	1	0	0	134	0	5	0
5	FO	ST_4	A	0	0	0	1	0	0	0	0	0	1	0	0	0	2	2	3	0
5	FO	ST_4	C	0	0	2	53	0	0	1	0	0	13	0	0	0	80	1	1	0
5	FO	ST_5	A	0	0	0	3	0	0	0	0	0	0	0	1	0	0	7	2	0
5	FO	ST_5	C	0	1	0	56	0	0	1	2	1	19	2	3	0	70	1	2	0
5	FO	ST_6	A	0	0	0	4	0	0	0	0	0	0	0	0	0	2	0	1	0
5	FO	ST_6	C	0	0	0	45	0	0	6	0	0	12	0	0	0	33	2	3	0
5	FO	ST_7	A	0	0	0	2	0	0	1	0	0	1	0	7	0	0	4	3	0
5	FO	ST_7	C	0	0	2	46	0	0	2	0	0	9	2	0	0	7	1	1	0
5	FO	ST_8	A	0	0	0	0	0	0	0	0	0	1	0	1	0	0	3	0	0
5	FO	ST_8	C	0	0	5	38	0	0	3	0	0	15	2	1	0	13	1	5	0
5	FO	ST_9	A	0	0	1	0	0	0	0	0	0	1	0	1	0	1	2	6	0
5	FO	ST_9	C	0	0	0	26	1	0	0	0	0	12	0	10	0	51	5	14	0
5	Sl	ST_1	A	0	0	0	1	0	0	0	0	0	1	0	0	0	1	1	0	0
5	SL	ST_1	C	0	0	3	50	0	0	0	1	0	5	2	0	0	48	2	1	0
5	SL	ST_10	A	0	0	0	0	0	0	0	0	0	0	0	0	0	0	0	1	0
5	SL	ST_10	C	0	0	0	11	0	0	0	2	0	6	13	0	0	1	1	0	0
5	SL	ST_2	A	0	0	0	1	0	0	0	0	0	0	0	1	0	1	2	3	0
5	SL	ST_2	C	0	1	0	50	0	0	0	1	1	6	0	0	0	80	1	7	1
5	SL	ST_3	A	0	0	0	0	0	0	0	0	0	3	0	3	0	1	2	10	1
5	SL	ST_3	C	0	0	1	62	0	0	0	0	0	5	1	1	0	49	2	0	0
5	SL	ST_4	A	0	0	0	1	0	0	0	0	0	0	0	2	0	0	0	0	0
5	SL	ST_4	C	0	0	0	37	0	0	2	0	0	1	2	0	0	5	0	1	0
5	SL	ST_5	A	0	0	0	0	0	0	0	0	0	1	0	0	0	1	2	15	0
5	SL	ST_5	C	0	0	0	10	0	0	0	0	1	4	6	0	0	16	2	3	0
5	SL	ST_6	A	0	0	0	0	0	0	0	0	0	0	0	1	0	0	3	17	0
5	SL	ST_6	C	0	0	0	3	0	0	3	2	0	6	17	0	0	4	1	1	0
5	SL	ST_7	A	0	0	0	1	0	0	0	0	0	0	0	0	0	2	1	0	0
5	SL	ST_7	C	0	0	0	24	0	0	1	0	0	2	2	1	0	47	6	6	0
5	SL	ST_8	A	0	0	0	0	0	0	0	0	0	1	0	0	0	1	0	0	0
5	SL	ST_8	C	0	0	0	20	0	0	0	0	0	5	1	0	0	12	2	3	0
5	SL	ST_9	A	0	0	0	1	0	0	0	1	0	1	0	2	0	2	1	1	0
5	SL	ST_9	C	0	3	0	15	0	0	0	1	0	10	3	0	0	34	6	6	0
6	FO	ST_1	A	0	0	0	3	0	0	0	0	0	0	0	0	0	0	3	0	0
6	FO	ST_1	C	0	1	0	47	0	0	0	1	0	3	5	1	0	0	0	0	0
6	FO	ST_10	A	0	0	0	0	0	0	0	2	0	0	0	0	0	1	1	0	1
6	FO	ST_10	C	0	0	1	16	0	0	1	26	1	4	1	0	0	3	5	0	0
6	FO	ST_2	A	0	0	0	3	0	0	0	0	0	0	0	0	0	0	9	0	0
6	FO	ST_2	C	0	1	1	35	0	0	0	0	0	2	0	0	0	5	0	1	1
6	FO	ST_3	A	0	0	0	2	0	0	0	0	0	0	0	0	0	7	6	1	0
6	FO	ST_3	C	0	0	0	39	0	0	1	8	0	1	0	0	0	30	7	0	1
6	FO	ST_4	A	0	0	0	0	0	0	0	0	0	0	0	3	0	3	4	1	0
6	FO	ST_4	C	0	0	2	30	0	0	0	22	0	4	0	2	0	13	3	3	0
6	FO	ST_5	A	0	0	0	2	0	0	0	0	0	0	0	3	0	3	8	4	0
6	FO	ST_5	C	0	0	0	29	0	0	0	10	0	0	0	15	0	14	12	10	0
6	FO	ST_6	A	0	0	0	0	0	0	0	0	0	0	0	0	0	5	3	0	0
6	FO	ST_6	C	0	1	0	15	0	0	0	7	0	2	0	1	0	6	6	3	0
6	FO	ST_7	A	0	0	0	1	0	0	0	0	0	0	0	0	0	1	3	2	0
6	FO	ST_7	C	0	1	0	19	0	0	0	11	0	0	0	2	0	21	4	2	0
6	FO	ST_8	A	0	0	0	2	0	0	0	0	0	0	0	3	0	0	0	0	1
6	FO	ST_8	C	0	0	6	47	0	0	0	2	0	2	1	2	0	7	9	0	1
6	FO	ST_9	A	0	0	0	0	0	0	0	4	0	0	0	1	0	0	2	8	0
6	FO	ST_9	C	0	0	1	20	0	0	0	8	0	0	0	5	0	6	6	10	1
6	Sl	ST_1	A	0	0	0	0	0	0	0	0	0	0	0	0	0	4	1	4	1
6	SL	ST_1	C	0	0	1	5	0	0	0	5	0	0	4	1	0	18	0	6	0
6	SL	ST_10	A	0	0	0	0	0	0	0	1	0	0	0	0	0	7	1	3	0
6	SL	ST_10	C	0	1	0	6	0	0	0	2	0	3	0	1	0	26	4	15	0
6	SL	ST_2	A	0	0	0	3	0	0	0	4	0	0	1	2	0	1	1	3	1
6	SL	ST_2	C	0	0	1	22	0	0	0	11	0	0	2	5	0	24	0	1	1
6	SL	ST_3	A	0	0	0	2	0	0	0	1	0	0	0	1	0	0	0	7	0
6	SL	ST_3	C	0	0	0	31	0	0	0	15	0	1	3	1	0	27	1	0	0
6	SL	ST_4	A	0	0	0	0	0	0	0	1	0	0	0	6	0	0	2	1	1
6	SL	ST_4	C	0	0	0	27	0	0	0	4	0	1	7	15	0	34	2	0	5
6	SL	ST_5	A	0	0	1	1	0	0	0	0	0	0	1	0	0	0	0	6	0
6	SL	ST_5	C	0	0	3	19	0	0	0	1	0	1	0	4	0	13	3	0	0
6	SL	ST_6	A	0	0	0	0	0	0	0	1	0	0	0	5	0	3	7	1	0
6	SL	ST_6	C	0	0	0	13	0	0	0	2	0	2	5	4	0	21	4	0	0
6	SL	ST_7	A	0	0	1	1	0	0	0	0	0	0	0	0	0	2	3	4	1
6	SL	ST_7	C	0	0	7	21	0	0	0	2	0	1	0	1	0	54	7	0	1
6	SL	ST_8	A	0	0	0	2	0	0	0	0	0	1	0	1	0	3	6	4	0
6	SL	ST_8	C	0	1	0	8	0	0	0	0	0	2	1	3	0	18	1	2	0
6	SL	ST_9	A	0	0	1	0	0	0	0	0	0	0	0	0	0	0	2	0	0
6	SL	ST_9	C	0	0	0	2	0	0	0	0	0	0	0	1	0	6	0	4	0
7	FO	ST_1	A	0	0	0	0	0	0	0	5	0	2	0	0	0	1	0	0	0
7	FO	ST_1	C	0	1	3	11	0	0	0	37	0	4	2	1	0	15	0	0	0
7	FO	ST_10	A	0	0	0	1	0	0	0	3	0	1	0	0	0	0	0	0	0
7	FO	ST_10	C	0	0	0	15	0	0	0	47	0	7	1	7	0	16	5	5	0
7	FO	ST_2	A	0	0	0	1	0	0	0	1	0	1	0	3	0	0	1	0	0
7	FO	ST_2	C	0	0	2	24	0	0	0	38	0	4	1	1	0	96	0	2	0
7	FO	ST_3	A	0	0	0	0	0	0	0	4	0	0	0	1	0	4	0	0	0
7	FO	ST_3	C	0	0	0	32	0	0	0	51	0	11	0	1	0	57	0	1	0
7	FO	ST_4	A	0	0	0	1	0	0	0	0	0	0	0	0	0	5	0	6	0
7	FO	ST_4	C	0	0	2	21	0	0	0	0	0	8	6	0	0	4	0	0	0
7	FO	ST_5	A	0	0	0	0	0	0	0	1	1	0	0	0	0	1	7	3	0
7	FO	ST_5	C	0	0	0	15	0	0	0	52	4	3	0	8	0	23	0	4	6
7	FO	ST_6	A	0	0	0	0	0	0	0	5	0	0	0	0	0	0	6	4	0
7	FO	ST_6	C	0	0	1	1	0	0	0	148	7	0	0	8	0	17	1	8	1
7	FO	ST_7	A	0	0	0	0	0	0	0	3	1	1	0	13	0	1	2	1	0
7	FO	ST_7	C	0	0	0	13	0	0	0	150	4	4	0	8	1	8	0	7	2
7	FO	ST_8	A	0	0	0	0	0	0	0	2	0	0	0	0	0	1	4	1	0
7	FO	ST_8	C	0	3	0	12	0	0	2	139	4	0	0	6	0	20	3	2	1
7	FO	ST_9	A	0	0	0	0	0	0	0	1	0	0	0	3	0	0	0	0	0
7	FO	ST_9	C	0	1	0	20	0	0	0	18	1	2	0	0	0	7	1	0	0
7	Sl	ST_1	A	0	0	0	2	0	0	0	6	0	1	0	4	0	2	0	2	0
7	SL	ST_1	C	0	0	2	7	0	0	1	14	0	16	0	5	0	20	0	5	0
7	SL	ST_10	A	0	0	0	0	0	0	0	1	0	0	0	0	0	2	0	0	0
7	SL	ST_10	C	0	0	1	15	0	0	0	2	1	3	2	0	0	3	1	1	0
7	SL	ST_2	A	0	0	0	3	0	0	0	0	0	2	0	0	0	3	2	5	0
7	SL	ST_2	C	0	0	2	14	0	0	0	8	0	2	2	3	0	27	0	5	0
7	SL	ST_3	A	0	0	0	0	0	0	0	1	0	0	0	2	0	0	8	3	0
7	SL	ST_3	C	0	0	2	20	0	0	0	17	0	10	1	1	0	13	2	5	0
7	SL	ST_4	A	0	0	0	2	0	0	0	0	0	1	0	0	0	1	7	2	0
7	SL	ST_4	C	0	0	2	10	0	0	0	3	0	7	0	4	0	18	0	0	0
7	SL	ST_5	A	0	0	0	1	0	0	0	2	0	2	0	0	0	0	0	2	0
7	SL	ST_5	C	0	1	2	12	0	0	0	12	0	11	2	1	0	3	0	2	0
7	SL	ST_6	A	0	0	0	0	0	0	0	2	0	1	0	0	0	0	2	0	0
7	SL	ST_6	C	0	0	2	2	0	0	0	18	0	10	0	14	0	31	1	3	0
7	SL	ST_7	A	0	0	0	1	0	0	0	4	0	0	0	1	0	5	1	1	0
7	SL	ST_7	C	0	0	1	7	0	0	0	22	0	4	1	2	0	60	0	4	0
7	SL	ST_8	A	0	0	0	0	0	0	0	5	0	0	0	0	0	1	0	0	0
7	SL	ST_8	C	0	0	0	13	0	0	0	33	0	2	0	0	0	64	0	11	0
7	SL	ST_9	A	0	0	0	0	0	0	0	0	0	0	0	1	0	2	0	2	0
7	SL	ST_9	C	0	0	0	7	0	0	1	4	0	4	0	0	0	7	0	3	0
8	FO	ST_1	A	0	0	0	1	0	0	0	0	0	0	0	0	0	2	1	1	0
8	FO	ST_1	C	0	0	0	30	0	0	0	1	2	8	5	5	0	100	4	6	3
8	FO	ST_10	A	0	0	0	1	0	0	0	1	0	0	0	2	0	1	1	6	0
8	FO	ST_10	C	0	0	3	18	0	0	0	42	0	0	0	2	0	13	4	11	1
8	FO	ST_2	A	0	0	0	1	0	0	0	0	0	0	0	3	0	7	0	4	0
8	FO	ST_2	C	0	1	0	21	0	0	0	3	0	2	6	6	0	96	5	10	2
8	FO	ST_3	A	0	0	0	1	0	0	0	0	0	0	0	0	0	0	4	2	1
8	FO	ST_3	C	0	0	0	52	0	0	0	2	0	1	1	0	0	51	8	6	7
8	FO	ST_4	A	0	0	0	1	0	0	0	2	0	0	0	3	0	6	4	11	0
8	FO	ST_4	C	0	0	2	15	0	0	0	69	0	0	1	2	0	60	5	22	4
8	FO	ST_5	A	0	0	0	0	0	0	0	4	1	0	0	0	0	2	1	6	0
8	FO	ST_5	C	0	0	3	16	0	0	0	82	3	0	2	0	0	43	21	12	1
8	FO	ST_6	A	0	0	0	0	0	0	0	3	0	0	0	1	0	1	1	2	0
8	FO	ST_6	C	0	0	2	4	0	0	0	122	2	2	1	1	0	47	5	26	2
8	FO	ST_7	A	0	0	0	0	0	0	0	0	0	0	0	0	0	2	4	6	1
8	FO	ST_7	C	0	0	0	14	0	0	0	62	1	1	1	6	0	81	2	4	6
8	FO	ST_8	A	0	0	0	1	0	0	0	0	0	0	0	0	0	5	3	5	0
8	FO	ST_8	C	0	0	0	25	0	0	0	21	0	0	2	2	0	67	1	14	5
8	FO	ST_9	A	0	0	0	0	0	0	0	2	0	0	0	0	0	1	2	3	0
8	FO	ST_9	C	0	0	3	13	0	0	0	36	0	3	1	6	0	28	4	13	5
8	Sl	ST_1	A	0	0	0	1	0	0	0	1	0	1	0	0	0	3	1	3	0
8	SL	ST_1	C	0	0	0	16	0	0	0	5	0	2	1	9	0	88	0	9	1
8	SL	ST_10	A	0	0	0	3	0	0	0	16	0	0	0	0	0	0	0	1	0
8	SL	ST_10	C	0	0	2	11	0	0	0	84	0	0	1	0	0	9	0	4	2
8	SL	ST_2	A	0	0	0	0	0	0	0	0	0	0	2	0	0	1	0	7	0
8	SL	ST_2	C	0	0	0	23	0	0	0	0	0	1	5	3	0	65	2	19	0
8	SL	ST_3	A	0	0	0	0	0	0	0	0	0	0	2	0	0	1	2	2	0
8	SL	ST_3	C	0	0	0	8	0	0	0	2	1	2	6	2	0	46	0	14	2
8	SL	ST_4	A	0	0	0	1	0	0	0	0	0	0	0	0	0	0	1	4	0
8	SL	ST_4	C	0	1	0	5	0	0	0	2	0	1	4	6	0	22	6	27	5
8	SL	ST_5	A	0	0	0	0	0	0	0	1	0	0	0	0	0	0	5	1	2
8	SL	ST_5	C	0	0	2	9	0	0	0	7	1	0	3	2	0	18	1	22	11
8	SL	ST_6	A	0	0	0	0	0	0	0	1	0	0	0	0	0	0	0	1	3
8	SL	ST_6	C	0	0	0	11	0	0	0	7	2	0	0	0	0	12	4	22	7
8	SL	ST_7	A	0	0	0	0	0	0	0	4	0	0	0	0	0	2	1	4	3
8	SL	ST_7	C	0	0	3	9	0	0	0	19	0	0	0	1	0	11	6	6	7
8	SL	ST_8	A	0	0	0	0	0	0	0	4	0	0	0	0	0	2	0	1	1
8	SL	ST_8	C	0	0	0	8	0	0	0	18	3	0	0	2	0	13	1	0	6
8	SL	ST_9	A	0	0	0	0	0	0	0	15	0	0	0	0	0	1	3	7	0
8	SL	ST_9	C	0	0	1	4	0	0	0	88	0	1	0	0	0	28	0	2	8
10	FO	ST_1	A	0	0	0	0	0	0	0	9	0	0	1	3	0	4	6	0	0
10	FO	ST_1	C	0	1	0	3	1	0	0	140	0	0	2	4	0	28	1	3	1
10	FO	ST_10	A	0	0	0	1	0	0	0	2	0	0	0	0	0	4	0	2	0
10	FO	ST_10	C	0	2	0	18	0	0	0	7	0	13	0	1	0	82	0	2	0
10	FO	ST_2	A	0	0	0	0	0	0	0	14	0	0	1	2	0	2	1	3	0
10	FO	ST_2	C	0	0	0	1	0	0	0	183	4	5	4	2	0	32	4	4	3
10	FO	ST_3	A	0	0	0	0	0	0	0	9	0	1	0	0	0	7	3	0	0
10	FO	ST_3	C	0	0	0	1	0	0	0	140	2	2	0	2	0	188	3	5	3
10	FO	ST_4	A	0	0	0	2	0	0	0	6	0	0	0	0	0	0	0	1	0
10	FO	ST_4	C	0	3	0	7	0	0	0	71	0	6	0	0	0	174	2	2	0
10	FO	ST_5	A	0	0	0	1	0	0	0	0	0	0	0	0	0	3	0	0	0
10	FO	ST_5	C	0	1	0	32	0	0	1	34	0	4	1	0	0	178	1	0	1
10	FO	ST_6	A	0	0	0	3	0	0	0	1	0	0	0	0	0	3	5	3	0
10	FO	ST_6	C	0	2	2	18	0	0	2	25	0	6	1	0	0	157	4	3	1
10	FO	ST_7	A	0	0	0	1	0	0	0	0	0	1	0	1	0	3	7	0	0
10	FO	ST_7	C	0	1	0	24	0	0	0	2	0	7	0	1	0	131	0	4	4
10	FO	ST_8	A	0	0	0	0	0	0	0	0	0	1	0	2	0	5	1	2	0
10	FO	ST_8	C	0	1	0	7	0	0	0	4	0	6	4	7	0	132	2	1	0
10	FO	ST_9	A	0	0	0	1	0	0	0	0	0	2	0	8	0	2	1	2	0
10	FO	ST_9	C	0	4	0	18	0	0	0	6	0	12	1	4	0	155	6	0	0
10	Sl	ST_1	A	0	0	0	1	0	0	0	1	0	0	0	1	0	0	0	3	0
10	SL	ST_1	C	0	3	0	11	1	0	2	40	1	1	1	7	0	6	0	6	0
10	SL	ST_10	A	0	0	0	0	0	0	0	34	0	0	1	3	0	2	7	2	0
10	SL	ST_10	C	0	0	0	4	0	0	0	77	1	4	0	1	0	15	5	5	0
10	SL	ST_2	A	0	0	0	0	0	0	0	20	0	0	0	0	0	1	1	1	0
10	SL	ST_2	C	0	0	0	9	0	0	0	113	0	1	1	0	0	30	5	0	0
10	SL	ST_3	A	0	0	0	2	0	0	0	19	0	0	0	0	0	0	1	0	0
10	SL	ST_3	C	0	2	0	15	0	0	0	129	0	1	0	2	0	13	0	6	2
10	SL	ST_4	A	0	0	0	0	0	0	0	30	0	0	0	0	0	1	0	0	0
10	SL	ST_4	C	0	1	0	2	0	0	0	113	0	0	1	0	0	29	0	1	0
10	SL	ST_5	A	0	0	0	0	0	0	0	11	0	0	0	7	0	4	1	1	1
10	SL	ST_5	C	0	0	0	3	0	0	0	54	0	3	4	0	0	12	0	0	0
10	SL	ST_6	A	0	0	0	0	0	0	0	12	0	0	0	0	0	7	6	1	0
10	SL	ST_6	C	0	0	0	4	0	0	0	22	0	1	0	1	0	14	0	2	3
10	SL	ST_7	A	0	0	0	0	0	0	0	15	0	0	1	1	0	1	1	1	3
10	SL	ST_7	C	0	0	0	12	0	0	1	40	0	0	1	0	0	23	0	6	4
10	SL	ST_8	A	0	0	0	1	0	0	0	24	1	0	0	0	0	1	1	4	0
10	SL	ST_8	C	0	0	0	0	0	0	0	40	0	0	1	0	0	18	0	2	3
10	SL	ST_9	A	0	0	0	0	0	0	0	32	0	0	0	3	0	5	1	1	0
10	SL	ST_9	C	0	2	0	2	0	0	0	102	1	0	0	1	0	36	5	2	0
11	FO	ST_1	A	0	0	0	0	0	0	1	3	0	1	0	3	0	7	9	3	0
11	FO	ST_1	C	0	0	0	19	1	0	1	19	0	6	3	2	0	47	12	9	3
11	FO	ST_10	A	0	0	0	0	0	0	0	0	0	0	0	0	0	4	2	0	0
11	FO	ST_10	C	0	1	0	6	0	0	0	27	1	1	0	0	0	41	2	4	1
11	FO	ST_2	A	0	0	0	1	0	0	1	2	0	2	0	3	0	0	3	4	1
11	FO	ST_2	C	0	1	0	13	1	0	2	28	0	17	0	2	0	6	14	10	3
11	FO	ST_3	A	0	0	0	0	1	0	0	0	0	1	0	0	0	1	6	4	1
11	FO	ST_3	C	0	0	0	38	0	0	3	31	0	15	1	0	1	36	18	11	1
11	FO	ST_4	A	0	0	0	0	0	0	0	4	0	1	0	0	0	2	6	5	0
11	FO	ST_4	C	0	0	0	19	0	0	1	17	0	17	0	0	0	14	7	2	0
11	FO	ST_5	A	0	0	0	0	0	0	0	2	0	3	0	0	0	0	7	5	1
11	FO	ST_5	C	0	0	0	20	0	0	0	11	1	25	0	1	0	8	2	1	17
11	FO	ST_6	A	0	0	0	6	0	0	1	0	0	0	0	0	0	3	9	0	0
11	FO	ST_6	C	0	0	0	24	0	0	4	2	0	11	3	0	0	4	2	2	0
11	FO	ST_7	A	0	0	0	1	0	0	0	0	0	1	0	2	0	0	8	1	0
11	FO	ST_7	C	0	0	0	30	0	0	1	1	0	16	1	2	0	2	2	4	0
11	FO	ST_8	A	0	0	0	2	0	0	0	0	0	1	0	4	0	4	4	0	0
11	FO	ST_8	C	0	0	0	21	0	0	0	2	0	12	0	3	0	8	4	1	0
11	FO	ST_9	A	0	0	0	0	0	0	0	4	0	3	0	3	0	5	10	2	0
11	FO	ST_9	C	0	0	0	22	0	0	1	25	0	5	0	3	0	50	6	3	0
11	Sl	ST_1	A	0	0	0	0	0	0	0	2	0	1	0	0	0	2	1	6	1
11	SL	ST_1	C	0	0	0	6	0	0	0	24	0	6	0	5	0	24	1	4	8
11	SL	ST_10	C	0	2	1	18	0	0	1	8	0	3	3	2	0	35	5	6	2
11	SL	ST_2	A	0	0	0	0	0	0	0	3	0	0	0	1	0	1	0	0	2
11	SL	ST_2	C	0	0	0	7	0	0	1	10	0	6	3	3	0	10	1	6	4
11	SL	ST_3	A	0	0	0	0	0	0	0	0	0	1	0	0	0	0	1	0	1
11	SL	ST_3	C	0	1	1	11	0	0	1	14	0	11	4	1	0	21	0	1	7
11	SL	ST_4	A	0	0	0	1	0	0	0	3	0	0	0	3	0	0	0	2	1
11	SL	ST_4	C	0	0	0	9	0	0	0	32	2	7	2	4	0	18	13	3	5
11	SL	ST_5	A	0	0	0	0	0	0	0	6	0	0	0	2	0	0	0	0	2
11	SL	ST_5	C	0	0	0	11	0	0	0	27	0	10	2	6	0	34	3	5	3
11	SL	ST_6	A	0	0	0	1	0	0	0	4	0	0	0	1	0	1	1	4	1
11	SL	ST_6	C	0	0	0	15	0	0	1	28	0	15	0	2	1	39	6	14	7
11	SL	ST_7	A	0	0	0	2	0	0	0	2	0	2	0	3	0	2	2	1	1
11	SL	ST_7	C	0	0	0	12	1	0	0	24	0	11	1	5	0	13	5	9	6
11	SL	ST_8	A	0	0	0	0	0	0	0	7	0	1	0	0	0	0	0	2	0
11	SL	ST_8	C	0	1	0	17	0	0	0	26	0	6	0	8	1	25	5	0	2
11	SL	ST_9	A	0	0	0	0	0	0	0	3	0	0	0	0	0	0	3	0	1
11	SL	ST_9	C	0	0	0	6	0	0	0	35	0	7	1	6	0	50	19	18	4
12	FO	ST_1	A	0	0	0	1	0	0	0	0	0	2	1	2	0	2	3	0	0
12	FO	ST_1	C	0	1	1	11	0	0	2	2	1	16	2	0	0	29	7	0	0
12	FO	ST_10	A	0	0	0	1	0	0	0	0	0	0	0	0	0	0	0	0	0
12	FO	ST_10	C	0	0	0	19	0	0	0	0	0	7	0	0	0	9	0	2	0
12	FO	ST_2	A	0	0	0	0	0	0	0	2	0	2	0	0	0	1	3	0	0
12	FO	ST_2	C	0	1	2	19	0	0	0	27	1	27	2	0	0	66	1	0	0
12	FO	ST_3	A	0	1	0	0	0	0	0	3	0	2	0	1	0	5	4	0	0
12	FO	ST_3	C	0	0	0	20	0	0	1	49	0	43	0	1	0	40	3	3	1
12	FO	ST_4	A	0	0	0	1	0	0	0	1	0	2	0	1	0	0	5	2	0
12	FO	ST_4	C	1	2	3	41	2	0	3	9	0	29	1	2	0	66	2	6	0
12	FO	ST_5	A	0	0	2	5	0	0	0	0	0	2	0	0	0	1	0	0	0
12	FO	ST_5	C	0	0	3	51	0	0	6	8	0	16	0	4	0	80	3	11	0
12	FO	ST_6	A	0	0	0	1	0	0	0	0	0	1	0	1	0	5	0	0	0
12	FO	ST_6	C	0	0	1	43	0	0	0	8	0	10	0	0	0	101	3	10	0
12	FO	ST_7	A	0	0	0	0	0	0	0	0	0	0	0	0	0	7	0	1	0
12	FO	ST_7	C	0	0	1	53	0	0	0	0	0	17	0	0	0	43	0	2	0
12	FO	ST_8	A	0	0	0	1	0	0	0	0	0	0	0	0	0	2	0	2	0
12	FO	ST_8	C	0	0	1	79	0	0	0	0	0	0	0	0	0	20	0	0	0
12	FO	ST_9	A	0	0	0	2	0	0	0	0	0	1	0	0	0	8	0	0	0
12	FO	ST_9	C	0	2	1	89	0	0	0	0	0	7	0	0	0	10	0	8	0
12	Sl	ST_1	A	0	0	0	2	0	0	0	0	0	0	0	0	0	3	2	0	0
12	SL	ST_1	C	0	1	0	26	0	0	0	1	0	6	0	0	0	36	6	5	0
12	SL	ST_10	A	0	0	0	7	0	0	1	0	0	0	0	0	0	0	0	0	0
12	SL	ST_10	C	0	0	0	46	0	0	2	0	0	7	0	1	0	29	0	0	0
12	SL	ST_2	A	0	0	0	8	0	0	0	0	0	0	0	0	0	3	0	0	0
12	SL	ST_2	C	0	1	0	26	0	0	0	2	0	1	3	0	0	72	5	1	0
12	SL	ST_3	A	0	0	0	3	0	0	0	0	0	2	0	0	0	0	0	0	0
12	SL	ST_3	C	0	2	0	32	1	0	0	1	0	10	1	1	0	53	11	0	0
12	SL	ST_4	A	0	0	0	4	0	0	0	0	0	1	0	0	0	0	9	0	0
12	SL	ST_4	C	0	0	0	53	0	0	1	1	0	8	0	3	0	136	15	11	0
12	SL	ST_5	A	0	0	0	1	0	0	1	0	0	0	0	0	0	2	0	0	0
12	SL	ST_5	C	0	3	1	54	0	0	5	1	0	2	1	0	0	31	4	3	0
12	SL	ST_6	A	0	0	1	0	0	0	0	1	0	2	0	0	0	0	0	0	0
12	SL	ST_6	C	0	1	0	12	0	0	1	2	0	9	0	3	0	15	2	1	0
12	SL	ST_7	A	0	0	0	1	0	0	0	0	0	1	0	0	0	2	2	0	0
12	SL	ST_7	C	0	0	0	18	0	0	0	21	0	24	0	3	0	16	0	3	0
12	SL	ST_8	A	0	0	0	3	0	0	0	0	0	1	0	1	0	1	0	0	0
12	SL	ST_8	C	0	0	0	26	0	0	0	4	0	16	0	2	0	74	0	3	0
12	SL	ST_9	A	0	0	0	0	0	0	0	0	0	0	0	0	0	0	0	2	0
12	SL	ST_9	C	0	1	0	38	0	0	0	1	0	7	8	0	0	26	0	8	0
14	FO	ST_1	A	0	0	0	2	0	0	0	0	0	1	0	0	0	1	0	5	0
14	FO	ST_1	C	0	0	0	26	0	0	0	1	0	11	4	3	0	8	0	2	0
14	FO	ST_10	A	0	0	0	1	0	0	0	0	0	1	0	3	0	0	1	0	0
14	FO	ST_10	C	0	0	0	15	0	0	0	1	0	11	0	9	0	5	0	3	0
14	FO	ST_2	A	0	0	0	0	0	0	0	0	0	0	0	0	0	0	0	1	0
14	FO	ST_2	C	0	1	1	18	0	0	0	1	0	4	7	1	1	7	0	4	0
14	FO	ST_3	A	0	0	0	0	0	0	0	0	0	0	0	0	0	1	0	0	0
14	FO	ST_3	C	0	1	0	15	0	0	0	0	0	5	2	9	0	12	3	4	0
14	FO	ST_4	A	0	0	0	0	0	0	0	0	0	0	1	0	0	2	2	0	0
14	FO	ST_4	C	0	0	0	4	0	0	0	1	1	11	1	4	0	14	2	5	0
14	FO	ST_5	A	0	0	0	1	0	0	0	0	0	2	0	1	0	0	0	0	0
14	FO	ST_5	C	0	0	0	12	2	0	0	0	0	8	4	2	0	7	0	2	0
14	FO	ST_6	A	0	0	0	0	0	0	0	0	0	2	0	1	0	0	0	0	0
14	FO	ST_6	C	0	0	0	13	0	0	0	0	0	6	2	4	0	10	2	0	0
14	FO	ST_7	A	0	0	0	0	0	0	0	0	0	0	0	2	0	0	0	3	0
14	FO	ST_7	C	0	0	0	15	0	0	0	3	0	3	0	10	0	18	2	4	0
14	FO	ST_8	A	0	0	0	0	0	0	0	0	0	0	0	4	0	0	0	0	0
14	FO	ST_8	C	0	0	0	14	0	0	0	1	0	7	5	1	0	11	2	1	0
14	FO	ST_9	A	0	0	0	1	0	0	0	0	0	2	0	0	0	0	0	0	0
14	FO	ST_9	C	0	0	0	8	0	0	0	0	0	11	3	7	0	13	2	4	0
14	Sl	ST_1	A	0	0	0	0	0	0	0	0	0	0	0	4	0	0	0	0	0
14	SL	ST_1	C	0	0	0	4	0	0	0	0	0	1	0	0	0	47	0	1	0
14	SL	ST_10	A	0	0	0	0	0	0	0	0	0	0	0	0	0	1	0	0	0
14	SL	ST_10	C	0	0	0	1	0	0	0	0	0	1	0	0	0	25	0	0	0
14	SL	ST_2	A	0	0	0	1	0	0	0	0	0	0	0	0	0	2	0	0	0
14	SL	ST_2	C	0	0	2	11	0	0	0	0	0	6	3	3	0	104	0	2	2
14	SL	ST_3	C	0	0	0	0	0	0	0	0	0	2	9	0	0	42	0	2	0
14	SL	ST_4	A	0	0	0	0	0	0	0	0	0	0	1	0	0	0	1	1	0
14	SL	ST_4	C	0	0	0	8	0	0	0	0	0	1	12	0	0	5	0	6	0
14	SL	ST_5	A	0	0	0	0	0	0	0	0	0	0	1	0	0	1	0	0	0
14	SL	ST_5	C	0	0	0	5	0	0	0	0	0	10	7	3	0	24	0	6	0
14	SL	ST_6	A	0	0	0	0	0	0	0	0	0	1	1	0	0	1	1	3	0
14	SL	ST_6	C	0	0	0	0	0	0	0	0	0	2	5	3	0	12	12	3	0
14	SL	ST_7	A	0	0	0	0	0	0	0	0	0	2	0	3	0	3	0	0	0
14	SL	ST_7	C	0	0	0	9	0	0	4	1	0	7	5	8	0	121	0	1	0
14	SL	ST_8	A	0	0	0	0	0	0	0	0	0	0	0	1	0	3	0	1	0
14	SL	ST_8	C	0	0	0	8	0	0	0	0	0	1	6	8	0	35	5	6	0
14	SL	ST_9	A	0	0	0	1	0	0	0	0	0	0	0	0	0	1	0	3	0
14	SL	ST_9	C	0	0	1	1	0	0	0	0	0	2	0	0	0	30	0	1	1
15	FO	ST_1	A	0	0	0	2	0	0	0	7	0	0	0	11	0	0	0	3	0
15	FO	ST_1	C	0	0	0	41	0	0	0	86	2	0	1	5	0	64	0	3	0
15	FO	ST_10	A	0	0	0	0	0	0	0	3	0	1	0	0	0	2	3	3	0
15	FO	ST_10	C	0	1	1	49	0	0	0	82	0	0	1	0	0	44	0	17	0
15	FO	ST_2	A	0	0	0	2	0	0	0	1	0	0	0	0	0	0	0	0	1
15	FO	ST_2	C	0	0	1	73	0	0	0	44	0	1	0	1	0	66	2	6	2
15	FO	ST_3	A	0	0	0	0	0	0	0	5	0	0	0	0	0	0	3	6	0
15	FO	ST_3	C	0	1	0	31	0	0	0	107	0	1	1	0	0	57	1	9	1
15	FO	ST_4	A	0	0	0	0	0	0	0	1	0	0	0	0	0	2	0	5	0
15	FO	ST_4	C	0	0	0	23	0	0	0	47	3	1	1	0	0	85	3	8	3
15	FO	ST_5	A	0	0	0	0	0	0	0	0	0	0	0	3	0	0	0	0	0
15	FO	ST_5	C	0	1	0	39	0	0	0	24	1	0	0	0	0	67	3	3	2
15	FO	ST_6	A	0	0	0	1	0	0	0	3	0	0	0	1	0	0	0	0	0
15	FO	ST_6	C	0	1	0	47	0	0	0	51	0	0	0	1	0	58	4	10	0
15	FO	ST_7	A	0	0	0	3	0	0	0	2	0	0	0	0	0	3	0	3	0
15	FO	ST_7	C	0	0	0	46	0	0	0	73	2	0	0	1	0	87	1	8	0
15	FO	ST_8	A	0	0	0	1	0	0	0	4	0	0	0	2	0	2	0	1	0
15	FO	ST_8	C	0	2	2	36	0	0	0	76	0	1	1	0	0	73	3	2	1
15	FO	ST_9	A	0	0	0	1	0	0	0	0	1	0	0	2	0	4	0	0	0
15	FO	ST_9	C	0	0	0	51	0	0	0	21	1	0	0	13	0	34	4	1	0
15	Sl	ST_1	A	0	0	0	0	0	0	0	3	0	0	0	0	0	1	0	1	1
15	SL	ST_1	C	0	0	0	14	0	0	0	19	2	0	0	2	0	23	0	0	2
15	SL	ST_10	A	0	0	0	0	0	0	0	0	0	0	0	0	0	1	0	0	0
15	SL	ST_10	C	0	0	0	10	0	0	0	4	0	0	0	0	0	25	0	3	1
15	SL	ST_2	A	0	0	0	1	0	0	0	8	0	0	0	1	0	2	1	0	1
15	SL	ST_2	C	0	0	0	6	0	0	0	22	1	0	3	0	0	17	3	4	1
15	SL	ST_3	A	0	0	0	1	0	0	0	5	0	0	0	0	0	3	0	1	1
15	SL	ST_3	C	0	0	0	26	0	0	0	48	2	0	1	0	0	24	0	8	0
15	SL	ST_4	A	0	0	0	0	0	0	0	6	0	0	0	4	0	4	0	1	0
15	SL	ST_4	C	0	0	0	27	0	0	0	12	2	0	1	0	0	44	0	0	1
15	SL	ST_5	A	0	0	0	1	0	0	0	8	0	0	0	0	0	1	3	4	0
15	SL	ST_5	C	0	0	0	26	0	0	0	32	2	0	2	2	0	42	0	3	0
15	SL	ST_6	A	0	0	0	1	0	0	0	11	0	0	0	0	0	0	0	5	1
15	SL	ST_6	C	0	0	0	41	0	0	0	64	5	2	1	7	0	39	1	15	0
15	SL	ST_7	A	0	0	0	1	0	0	0	16	0	0	0	0	0	1	1	3	0
15	SL	ST_7	C	0	0	0	24	0	0	0	67	1	0	0	0	0	53	6	9	2
15	SL	ST_8	A	0	0	0	3	0	0	0	2	0	0	0	0	0	1	1	1	0
15	SL	ST_8	C	0	1	0	36	0	0	0	35	0	0	1	0	0	79	2	16	0
15	SL	ST_9	A	0	0	0	1	0	0	0	2	0	0	0	0	0	2	1	0	0
15	SL	ST_9	C	0	0	0	19	0	0	0	14	0	0	0	0	0	38	3	9	1
16	FO	ST_1	A	0	0	0	0	0	0	0	9	0	0	0	0	0	1	2	1	0
16	FO	ST_1	C	0	0	2	10	0	0	0	96	0	0	1	0	0	45	17	7	1
16	FO	ST_10	A	0	0	0	0	0	0	0	5	0	0	0	0	0	0	2	0	0
16	FO	ST_10	C	0	0	2	18	0	0	0	258	1	0	3	0	1	41	2	2	0
16	FO	ST_2	A	0	0	0	0	0	0	0	5	0	0	0	1	0	0	3	5	0
16	FO	ST_2	C	0	0	1	10	0	0	0	122	1	0	2	0	0	34	6	10	0
16	FO	ST_3	A	0	0	0	0	0	0	0	3	0	0	0	0	0	5	4	1	0
16	FO	ST_3	C	0	0	0	13	0	0	0	197	2	0	1	0	0	44	4	8	0
16	FO	ST_4	A	0	0	0	1	0	0	0	7	0	0	0	3	0	0	7	1	0
16	FO	ST_4	C	0	0	0	13	0	0	0	252	0	0	1	0	0	50	4	7	0
16	FO	ST_5	A	0	0	0	1	0	0	0	8	0	0	0	2	0	4	4	4	0
16	FO	ST_5	C	0	0	1	6	0	0	0	213	0	0	0	5	0	43	6	0	0
16	FO	ST_6	A	0	0	1	0	0	0	0	5	1	0	0	1	0	1	1	0	0
16	FO	ST_6	C	0	0	3	16	0	0	0	193	3	0	0	0	0	60	13	3	0
16	FO	ST_7	A	0	0	0	0	0	0	0	4	0	0	0	1	0	4	2	1	0
16	FO	ST_7	C	0	0	4	12	0	0	0	219	0	0	0	2	0	41	14	5	0
16	FO	ST_8	A	0	0	0	0	0	0	0	4	0	0	0	0	0	1	0	3	0
16	FO	ST_8	C	0	0	2	16	0	0	0	229	1	0	0	0	0	53	8	0	1
16	FO	ST_9	A	0	0	0	1	0	0	0	6	0	0	0	0	0	3	3	7	0
16	FO	ST_9	C	0	0	0	14	0	0	0	167	0	0	0	0	0	59	21	3	0
16	Sl	ST_1	A	0	0	0	0	0	0	0	10	0	0	0	1	0	0	1	0	0
16	SL	ST_1	C	0	1	0	1	0	0	0	55	0	0	0	10	0	42	6	4	0
16	SL	ST_10	A	0	0	0	0	0	0	0	6	0	0	0	0	0	0	0	3	0
16	SL	ST_10	C	0	0	0	0	0	0	0	40	1	0	1	0	0	12	0	8	0
16	SL	ST_2	A	0	0	0	0	0	0	0	9	0	0	0	0	0	0	0	1	0
16	SL	ST_2	C	0	0	1	7	0	0	1	81	0	0	0	1	0	33	7	7	1
16	SL	ST_3	A	0	0	0	1	0	0	0	17	0	0	0	2	0	1	0	1	0
16	SL	ST_3	C	0	1	1	16	0	0	0	84	2	0	0	10	0	29	4	7	2
16	SL	ST_4	A	0	0	0	0	0	0	0	11	0	0	0	2	0	0	3	0	0
16	SL	ST_4	C	0	0	0	5	0	0	0	37	1	0	0	12	0	13	9	7	7
16	SL	ST_5	A	0	0	0	1	0	0	0	22	0	0	0	0	0	1	5	0	0
16	SL	ST_5	C	0	0	4	10	0	0	0	118	1	0	0	4	0	52	12	9	0
16	SL	ST_6	A	0	0	0	0	0	0	0	18	0	0	0	0	0	0	0	5	1
16	SL	ST_6	C	0	0	0	7	0	0	0	77	1	0	1	1	0	41	37	8	6
16	SL	ST_7	A	0	0	0	0	0	0	0	9	0	0	0	0	0	1	8	5	3
16	SL	ST_7	C	0	0	0	0	0	0	0	68	0	0	2	12	0	8	12	4	5
16	SL	ST_8	A	0	0	0	0	0	0	0	6	0	0	2	1	0	2	2	0	3
16	SL	ST_8	C	0	0	0	2	0	0	0	33	1	0	5	0	0	9	8	2	9
16	SL	ST_9	A	0	0	0	0	0	0	0	6	0	0	2	0	0	0	1	4	0
16	SL	ST_9	C	0	0	0	6	0	0	0	61	0	0	8	0	0	18	5	6	2
1	FO	ST_1	D	0	0	38	12	0	0	0	0	0	101	0	0	0	0	0	0	0
1	FO	ST_10	D	0	0	0	61	0	0	0	0	0	9	0	0	0	0	0	0	0
1	FO	ST_2	D	0	0	16	152	0	0	0	0	0	17	0	0	0	0	0	0	0
1	FO	ST_3	D	0	0	0	65	0	0	0	0	0	0	0	0	0	0	0	0	0
1	FO	ST_4	D	0	0	0	22	0	0	0	0	0	12	0	0	0	0	0	0	0
1	FO	ST_5	D	0	0	0	37	0	0	0	10	0	10	0	0	0	0	0	0	0
1	FO	ST_6	D	0	0	0	115	0	0	0	0	0	0	0	0	0	0	0	0	0
1	FO	ST_7	D	0	0	0	70	0	0	0	0	0	0	0	0	0	0	0	0	0
1	FO	ST_8	D	0	0	0	21	0	0	0	0	0	0	0	0	0	0	0	0	0
1	FO	ST_9	D	0	0	0	31	0	0	0	0	0	0	0	0	0	0	0	0	0
1	Sl	ST_1	D	0	46	2647	0	0	0	0	0	0	25	0	0	0	0	0	0	0
1	SL	ST_10	D	0	0	8	36	0	0	0	21	0	0	0	0	14	0	0	0	0
1	SL	ST_2	D	0	0	453	1683	0	0	0	0	0	0	0	0	0	0	0	0	0
1	SL	ST_3	D	0	0	437	30	0	0	0	0	0	6	0	0	0	0	0	0	0
1	SL	ST_4	D	0	0	0	236	0	0	0	0	0	0	0	0	0	0	0	0	0
1	SL	ST_5	D	0	0	490	328	0	0	0	17	0	20	0	0	0	0	0	0	0
1	SL	ST_6	D	0	0	0	881	0	0	0	16	0	52	0	0	0	0	0	0	0
1	SL	ST_7	D	0	0	0	264	0	0	0	36	0	0	0	0	0	0	0	0	0
1	SL	ST_8	D	0	0	263	116	0	0	0	157	0	0	73	0	0	16	0	0	0
1	SL	ST_9	D	0	0	24	182	0	0	0	0	0	0	0	16	13	0	0	0	0
2	FO	ST_1	D	0	0	0	0	0	0	0	0	0	0	20	0	0	0	0	0	0
2	FO	ST_10	D	0	0	0	40	0	0	0	0	0	26	0	0	0	0	0	0	0
2	FO	ST_2	D	0	0	0	20	0	0	0	0	0	0	35	0	0	0	0	0	0
2	FO	ST_3	D	0	0	0	10	0	0	0	0	0	0	0	0	0	0	0	0	0
2	FO	ST_4	D	0	0	0	32	0	0	0	0	0	0	18	0	0	0	0	0	0
2	FO	ST_5	D	0	0	0	47	0	0	0	0	0	0	0	0	0	0	0	0	0
2	FO	ST_6	D	0	0	0	61	0	0	0	0	0	10	0	0	0	0	0	0	0
2	FO	ST_8	D	0	0	0	10	0	0	0	0	0	0	0	0	0	0	0	0	0
2	FO	ST_9	D	0	0	0	0	0	0	0	0	0	0	90	0	0	0	0	0	0
2	Sl	ST_1	D	0	0	0	316	0	0	0	0	0	13	100	0	0	0	0	0	0
2	SL	ST_10	D	0	0	255	57	0	0	0	0	0	0	0	0	0	0	0	0	0
2	SL	ST_2	D	0	0	258	163	0	0	0	0	0	0	24	0	0	0	0	0	0
2	SL	ST_3	D	0	0	0	100	0	0	0	0	0	0	22	0	0	0	0	0	0
2	SL	ST_4	D	0	0	449	100	0	0	0	0	0	0	21	0	0	0	0	0	0
2	SL	ST_5	D	0	0	0	100	0	0	0	0	0	15	116	0	0	0	0	0	0
2	SL	ST_6	D	0	0	0	275	0	0	0	0	0	0	0	0	0	0	0	0	0
2	SL	ST_8	D	0	0	40	0	0	0	0	0	0	0	0	0	0	0	0	0	0
2	SL	ST_9	D	0	8	315	190	0	0	0	0	0	0	0	0	0	0	0	0	0
3	FO	ST_1	D	0	0	36	228	0	0	0	0	0	0	32	0	0	0	0	0	0
3	FO	ST_2	D	0	0	0	76	0	0	0	0	0	0	0	0	0	0	0	0	0
3	FO	ST_3	D	0	0	0	27	0	0	0	0	0	0	0	24	0	0	12	12	0
3	FO	ST_5	D	0	0	50	0	0	0	0	0	0	0	0	0	0	0	0	0	0
3	FO	ST_6	D	0	0	0	9	0	0	0	0	0	15	0	0	0	0	0	0	0
3	FO	ST_7	D	0	0	22	0	0	0	0	0	0	0	0	0	0	0	0	0	0
3	FO	ST_8	D	0	0	17	0	0	0	0	0	0	0	12	0	0	0	0	0	0
3	FO	ST_9	D	0	0	0	141	0	0	0	0	0	0	10	0	0	0	0	0	0
3	Sl	ST_1	D	0	0	137	202	0	0	0	0	0	0	0	34	0	6	0	0	0
3	SL	ST_10	D	0	0	34	15	0	0	0	0	0	0	0	0	0	0	0	0	0
3	SL	ST_2	D	0	0	97	0	0	0	0	0	0	0	0	58	0	0	0	18	0
3	SL	ST_3	D	0	371	109	30	0	0	0	44	0	59	0	87	0	0	0	0	0
3	SL	ST_4	D	0	0	53	285	0	0	0	127	0	0	0	744	0	0	0	0	0
3	SL	ST_5	D	0	0	83	0	0	0	0	13	0	96	0	0	0	0	0	0	0
3	SL	ST_6	D	0	0	494	43	0	0	0	0	0	26	0	0	0	0	0	0	0
3	SL	ST_7	D	0	0	74	0	0	0	0	0	0	31	0	0	0	28	0	0	0
3	SL	ST_8	D	0	0	0	307	0	0	0	0	0	0	0	103	0	0	0	92	0
3	SL	ST_9	D	0	0	73	0	0	0	0	0	0	0	35	0	0	15	0	0	0
4	FO	ST_1	D	0	0	0	10	0	0	0	0	0	0	0	0	0	0	0	0	0
4	FO	ST_10	D	0	0	0	33	0	0	0	0	0	12	0	0	0	0	0	0	0
4	FO	ST_2	D	0	0	0	20	0	0	0	0	0	0	0	0	0	0	0	0	0
4	FO	ST_3	D	0	0	0	0	0	0	0	0	0	0	0	0	0	30	0	0	0
4	FO	ST_4	D	0	0	0	25	0	0	0	0	0	0	0	0	0	0	0	0	0
4	FO	ST_5	D	0	0	0	50	0	0	0	0	0	0	0	0	0	0	0	0	0
4	FO	ST_6	D	0	0	0	53	0	0	0	0	0	12	0	0	0	12	0	0	0
4	FO	ST_7	D	0	0	0	109	0	0	0	0	0	0	0	0	0	0	0	0	0
4	FO	ST_8	D	0	0	0	20	0	0	0	0	0	0	0	0	0	0	0	0	0
4	FO	ST_9	D	0	0	0	7	0	0	0	0	0	0	0	0	0	0	0	0	0
4	Sl	ST_1	D	0	0	786	0	0	0	194	125	0	0	0	0	0	10	0	0	0
4	SL	ST_10	D	0	0	400	21	0	0	0	0	0	0	0	0	0	0	0	0	0
4	SL	ST_2	D	0	0	300	0	0	0	0	0	0	0	0	0	0	0	0	0	0
4	SL	ST_3	D	0	0	1080	53	0	0	771	31	0	0	0	0	0	0	0	0	0
4	SL	ST_4	D	0	0	381	0	0	0	0	0	0	0	0	0	0	19	0	0	0
4	SL	ST_5	D	0	0	786	80	0	0	526	0	0	0	52	0	0	0	0	0	0
4	SL	ST_6	D	0	0	1000	51	0	0	0	0	0	0	0	0	0	0	0	0	0
4	SL	ST_7	D	0	0	400	42	0	0	0	0	0	0	0	0	0	0	0	0	0
4	SL	ST_8	D	0	0	400	112	0	0	0	0	0	0	0	0	0	0	0	0	0
4	SL	ST_9	D	0	0	448	0	0	0	0	33	0	0	0	0	0	0	0	0	0
5	FO	ST_1	D	0	0	0	255	0	0	0	0	0	15	0	0	0	0	0	0	0
5	FO	ST_10	D	0	0	0	61	0	0	0	0	0	13	0	0	0	0	0	0	0
5	FO	ST_2	D	0	0	0	342	0	0	0	0	0	0	0	0	0	0	0	0	0
5	FO	ST_4	D	0	0	0	170	0	0	0	0	0	24	16	0	0	0	0	0	0
5	FO	ST_5	D	0	0	0	0	0	0	0	0	0	10	0	0	0	0	0	0	0
5	FO	ST_6	D	0	0	29	64	0	0	0	0	0	0	0	0	0	0	0	0	0
5	FO	ST_7	D	0	0	0	11	0	0	0	0	0	0	0	0	0	26	0	0	0
5	FO	ST_8	D	0	0	0	19	0	0	0	0	0	0	0	0	0	0	0	0	0
5	Sl	ST_1	D	0	0	161	272	0	0	0	0	0	26	0	0	0	0	0	0	0
5	SL	ST_10	D	0	0	0	29	0	0	0	0	0	10	59	0	0	0	0	0	0
5	SL	ST_2	D	0	0	88	571	0	0	0	0	0	0	20	0	0	0	0	0	0
5	SL	ST_3	D	0	0	19	51	0	0	0	0	0	0	0	0	0	0	0	0	0
5	SL	ST_4	D	0	0	100	0	0	0	28	0	0	0	19	0	0	0	0	0	0
5	SL	ST_5	D	0	0	100	178	0	0	0	0	0	0	35	0	0	0	0	0	0
5	SL	ST_6	D	0	0	89	0	0	0	0	0	0	0	83	0	0	0	0	0	0
5	SL	ST_7	D	0	0	0	0	0	0	0	0	0	0	23	0	0	0	0	0	0
5	SL	ST_8	D	0	0	0	73	0	0	0	0	0	0	0	0	0	0	0	0	0
5	SL	ST_9	D	0	0	54	55	0	0	0	0	0	11	41	0	0	0	0	0	0
6	FO	ST_10	D	0	0	395	0	0	0	0	223	0	0	0	0	0	0	0	0	0
6	FO	ST_2	D	0	0	0	20	0	0	0	0	0	0	0	0	0	0	0	0	0
6	FO	ST_4	D	0	0	0	49	0	0	0	0	0	0	0	0	0	0	0	0	0
6	FO	ST_5	D	0	0	0	25	0	0	0	0	0	0	0	0	0	0	0	0	0
6	FO	ST_6	D	0	0	8	44	0	0	0	0	0	0	0	0	0	0	0	0	0
6	FO	ST_7	D	0	0	7	0	0	0	0	0	0	0	0	0	0	0	0	0	0
6	FO	ST_9	D	0	0	0	19	0	0	0	219	0	0	0	0	0	0	0	0	0
6	Sl	ST_1	D	0	0	19	73	0	0	0	164	0	0	206	0	0	0	0	0	19
6	SL	ST_10	D	0	0	0	0	0	0	61	0	0	0	0	0	0	0	0	0	0
6	SL	ST_2	D	0	0	44	227	0	0	0	43	0	0	274	0	0	0	0	0	0
6	SL	ST_3	D	0	0	0	0	0	0	0	13	0	0	105	0	0	0	0	0	0
6	SL	ST_4	D	0	73	0	46	0	0	0	12	0	0	0	0	0	49	0	0	50
6	SL	ST_5	D	0	39	153	219	0	0	0	0	0	0	33	0	0	0	0	0	0
6	SL	ST_6	D	0	0	53	0	0	0	0	0	0	0	0	0	0	10	0	0	0
6	SL	ST_7	D	0	229	7	25	0	0	0	0	0	0	0	0	0	0	0	0	0
6	SL	ST_8	D	0	0	135	0	0	0	0	0	0	0	0	0	0	0	0	0	0
6	SL	ST_9	D	0	0	188	0	0	0	0	0	0	0	0	0	0	0	0	0	0
7	FO	ST_1	D	0	0	0	0	0	0	0	0	0	12	0	0	0	0	0	0	0
7	FO	ST_10	D	0	0	0	172	0	0	0	0	0	0	0	0	0	0	0	0	0
7	FO	ST_2	D	0	0	39	12	0	0	0	0	0	0	0	0	0	0	0	0	0
7	FO	ST_3	D	0	0	184	88	0	0	0	0	0	21	0	0	0	0	0	0	0
7	FO	ST_5	D	0	0	0	101	0	0	0	0	0	0	0	0	0	0	0	0	0
7	FO	ST_6	D	0	0	0	44	0	0	0	51	23	0	0	0	0	0	0	0	0
7	FO	ST_7	D	0	0	0	0	0	0	0	58	0	0	0	0	0	0	0	0	0
7	FO	ST_8	D	0	0	0	30	0	0	0	108	0	0	0	0	0	0	0	0	0
7	FO	ST_9	D	0	0	0	0	0	0	0	14	0	0	0	0	0	0	0	0	0
7	Sl	ST_1	D	0	0	2692	1050	0	0	0	0	0	0	0	0	0	0	0	0	0
7	SL	ST_10	D	0	0	0	147	0	0	0	0	0	0	0	0	0	0	0	0	0
7	SL	ST_2	D	0	0	0	105	0	0	0	0	0	4	0	0	0	0	0	0	0
7	SL	ST_3	D	0	0	0	135	0	0	0	0	0	0	0	0	0	0	0	0	0
7	SL	ST_4	D	0	0	0	149	0	0	0	0	0	0	0	0	0	0	0	0	0
7	SL	ST_5	D	0	0	0	29	0	0	0	23	0	0	0	0	0	0	0	0	0
7	SL	ST_6	D	0	0	0	85	0	0	0	32	0	0	0	0	0	0	0	0	0
7	SL	ST_7	D	0	0	654	65	0	0	0	0	0	31	0	0	0	0	0	0	0
7	SL	ST_8	D	0	0	0	37	0	0	0	0	0	0	0	0	0	4	0	0	0
7	SL	ST_9	D	0	0	134	0	0	0	0	0	0	0	0	0	0	0	0	0	0
8	FO	ST_1	D	0	0	0	75	0	0	0	0	0	0	0	0	0	0	0	0	0
8	FO	ST_10	D	0	0	0	51	0	0	0	0	0	0	0	0	0	0	0	0	0
8	FO	ST_2	D	0	0	0	22	0	0	0	0	0	0	0	0	0	14	0	0	0
8	FO	ST_3	D	0	0	0	9	0	0	0	0	0	0	0	0	0	0	20	0	0
8	FO	ST_7	D	0	0	34	15	0	0	0	16	0	0	0	0	0	0	0	0	0
8	FO	ST_9	D	0	0	0	21	0	0	0	0	0	0	0	0	0	0	0	10	0
8	Sl	ST_1	D	0	0	58	640	0	0	0	0	662	0	50	0	0	0	0	0	0
8	SL	ST_10	D	0	0	76	12	0	0	0	0	0	0	0	0	0	0	0	0	0
8	SL	ST_2	D	0	0	0	182	0	0	0	0	0	0	0	0	0	0	0	0	0
8	SL	ST_3	D	0	0	0	35	0	0	723	0	0	0	0	0	0	88	0	0	0
8	SL	ST_4	D	0	0	0	257	0	0	0	0	0	0	0	0	0	0	0	0	0
8	SL	ST_5	D	0	0	0	143	0	0	0	0	0	0	0	0	0	0	0	0	0
8	SL	ST_6	D	0	0	0	439	0	0	464	10	0	0	0	0	0	0	0	0	0
8	SL	ST_7	D	0	0	0	208	0	0	335	0	0	0	0	0	0	0	0	0	0
8	SL	ST_8	D	0	0	0	145	0	0	121	0	0	0	0	0	0	0	0	0	0
8	SL	ST_9	D	0	0	0	247	0	0	0	13	0	0	0	0	0	0	0	0	0
10	FO	ST_1	D	0	0	0	19	0	0	0	33	0	0	46	0	0	0	0	0	0
10	FO	ST_10	D	0	0	0	47	0	0	0	0	0	1	0	0	0	0	0	0	0
10	FO	ST_2	D	0	0	0	0	0	0	0	22	0	0	0	0	0	0	0	0	0
10	FO	ST_3	D	0	0	0	0	0	0	0	26	0	0	0	0	0	0	0	0	0
10	FO	ST_4	D	0	0	0	18	0	0	0	27	0	0	0	0	0	0	0	0	0
10	FO	ST_5	D	0	6	0	25	0	0	0	0	0	0	0	0	0	0	0	0	0
10	FO	ST_7	D	0	0	0	233	0	0	0	0	0	0	0	0	0	0	0	0	0
10	FO	ST_9	D	0	0	0	70	0	0	0	0	0	0	88	0	0	0	0	0	0
10	Sl	ST_1	D	0	0	880	36	64	0	464	110	0	0	0	0	0	0	0	0	0
10	SL	ST_10	D	0	0	0	0	0	0	0	158	0	0	0	0	0	0	0	0	0
10	SL	ST_2	D	0	0	0	112	0	0	0	99	40	0	0	0	0	0	0	0	0
10	SL	ST_3	D	0	0	0	0	0	0	0	22	105	0	0	0	0	0	0	0	0
10	SL	ST_4	D	0	0	0	0	0	0	0	63	32	0	0	0	0	0	0	0	0
10	SL	ST_5	D	0	0	0	73	0	0	60	48	0	0	350	0	0	0	0	0	0
10	SL	ST_6	D	0	0	0	126	0	0	108	0	0	0	99	0	0	0	0	0	0
10	SL	ST_7	D	0	582	0	52	0	0	590	0	33	0	0	0	0	0	0	0	0
10	SL	ST_8	D	0	0	0	0	0	0	0	19	0	0	0	0	0	0	0	0	0
10	SL	ST_9	D	0	0	0	0	0	0	0	81	0	0	0	0	0	0	0	0	0
11	FO	ST_1	D	0	0	0	0	0	0	0	10	0	10	0	0	0	0	0	0	43
11	FO	ST_2	D	0	0	0	8	0	0	0	0	0	0	0	0	0	0	0	0	0
11	FO	ST_3	D	0	0	0	0	0	0	0	17	0	30	0	0	0	0	0	0	0
11	FO	ST_4	D	0	0	0	26	0	0	0	0	0	15	0	0	0	0	0	0	0
11	FO	ST_5	D	0	0	0	10	0	0	21	33	0	26	0	0	0	0	0	0	0
11	FO	ST_6	D	0	0	0	42	0	0	53	0	0	22	0	0	0	0	0	0	0
11	FO	ST_7	D	0	0	0	62	0	0	0	0	0	12	0	0	0	0	0	0	0
11	FO	ST_9	D	0	0	0	0	0	0	0	10	0	31	0	0	0	0	0	0	0
11	Sl	ST_1	D	0	0	1191	66	0	0	1543	58	0	0	53	0	0	0	0	0	88
11	SL	ST_10	D	0	0	101	96	0	0	0	31	0	0	0	0	0	0	0	0	0
11	SL	ST_2	D	0	0	0	84	0	0	0	28	0	0	0	0	0	0	0	0	87
11	SL	ST_3	D	0	751	0	386	0	0	0	0	0	10	28	0	0	0	0	0	6
11	SL	ST_4	D	0	624	0	418	0	0	1308	57	0	20	0	0	0	0	0	0	50
11	SL	ST_5	D	0	0	0	315	0	0	0	138	0	0	0	0	0	0	0	0	200
11	SL	ST_6	D	0	0	0	67	0	0	0	68	0	31	0	0	0	0	0	0	100
11	SL	ST_7	D	0	0	0	299	0	0	0	12	0	0	0	0	0	0	0	0	60
11	SL	ST_8	D	0	0	0	175	0	0	0	0	0	0	49	0	0	0	0	0	0
11	SL	ST_9	D	0	134	0	261	0	0	0	11	135	23	0	0	0	0	0	0	0
12	FO	ST_1	D	0	0	0	100	0	0	0	0	0	0	0	0	0	0	0	0	0
12	FO	ST_2	D	0	0	0	24	0	0	0	72	0	0	0	0	0	0	0	0	0
12	FO	ST_3	D	0	0	0	0	0	0	0	31	0	13	0	0	0	0	0	0	0
12	FO	ST_4	D	0	0	0	12	0	0	0	0	0	9	0	0	0	0	0	0	0
12	FO	ST_5	D	0	0	0	25	0	0	0	0	0	0	0	0	0	0	0	0	0
12	FO	ST_6	D	0	0	0	14	0	0	52	0	0	0	0	0	0	0	0	0	0
12	FO	ST_7	D	0	0	0	10	0	0	0	0	0	0	0	0	0	0	0	0	0
12	FO	ST_8	D	0	0	0	12	0	0	0	0	0	0	0	0	0	0	0	0	0
12	Sl	ST_1	D	0	0	100	1314	0	678	1323	0	0	0	0	0	0	0	0	0	0
12	SL	ST_10	D	0	0	0	10	0	0	0	0	0	15	0	0	0	0	0	0	15
12	SL	ST_2	D	0	0	100	248	0	0	0	0	0	0	0	0	0	0	0	0	0
12	SL	ST_3	D	0	0	694	244	0	0	0	0	0	12	0	0	0	0	0	0	0
12	SL	ST_4	D	0	0	530	435	0	0	341	0	0	0	0	0	0	0	0	0	0
12	SL	ST_5	D	0	0	238	100	0	0	155	0	0	0	0	0	0	0	0	0	0
12	SL	ST_6	D	0	0	198	704	0	0	0	0	0	0	0	0	0	0	0	0	0
12	SL	ST_7	D	0	0	293	415	0	0	99	0	0	46	0	0	0	0	0	0	0
12	SL	ST_8	D	0	0	258	54	0	0	0	0	0	0	0	0	0	0	0	0	0
12	SL	ST_9	D	0	0	86	247	0	0	0	0	0	0	0	0	108	0	0	0	0
14	FO	ST_10	D	0	0	0	32	0	0	0	30	0	0	0	0	0	0	0	0	0
14	FO	ST_2	D	0	0	0	15	0	0	0	0	0	0	0	0	0	0	0	0	0
14	FO	ST_3	D	0	0	0	30	0	0	0	0	0	0	0	0	0	0	0	0	0
14	FO	ST_4	D	0	0	0	0	0	0	0	0	0	0	34	0	0	0	0	0	0
14	FO	ST_5	D	0	0	0	16	0	0	0	0	0	0	0	0	0	0	0	0	0
14	FO	ST_9	D	0	0	0	40	0	0	0	0	0	0	43	0	0	0	0	0	0
14	Sl	ST_1	D	0	0	4162	23	0	0	0	0	0	0	0	0	0	0	0	0	0
14	SL	ST_10	D	0	0	173	0	0	0	0	0	0	0	47	0	0	0	0	0	0
14	SL	ST_2	D	0	0	949	282	0	0	0	0	0	28	10	0	0	0	0	0	0
14	SL	ST_3	D	0	0	729	0	0	0	0	0	0	0	46	0	0	0	0	0	0
14	SL	ST_4	D	0	0	577	0	0	0	0	0	0	0	93	0	0	0	0	0	0
14	SL	ST_5	D	0	0	180	69	0	0	0	0	0	0	120	0	0	0	0	0	0
14	SL	ST_6	D	0	0	953	164	0	0	0	0	0	0	40	0	0	0	0	0	0
14	SL	ST_7	D	0	0	246	410	0	0	25	0	0	0	63	0	0	0	0	0	0
14	SL	ST_8	D	0	0	275	0	0	0	0	0	0	0	0	0	0	0	0	0	0
14	SL	ST_9	D	0	0	498	0	0	0	320	0	0	0	0	0	0	60	0	0	0
15	FO	ST_1	D	0	0	0	15	0	0	0	0	0	0	0	0	0	0	0	0	0
15	FO	ST_2	D	0	0	0	60	0	0	0	0	0	0	19	0	0	0	0	0	0
15	FO	ST_5	D	0	0	0	135	0	0	0	0	0	0	0	0	0	0	0	0	0
15	FO	ST_6	D	0	0	0	18	0	0	0	0	0	0	0	0	0	0	0	0	0
15	FO	ST_8	D	0	0	0	144	0	0	0	0	0	0	0	0	0	0	0	0	0
15	FO	ST_9	D	0	0	0	18	0	0	0	0	0	0	0	0	0	0	0	0	0
15	Sl	ST_1	D	0	0	0	582	0	0	0	0	0	0	15	0	0	0	0	0	0
15	SL	ST_2	D	0	0	0	717	0	0	0	0	0	0	0	0	0	0	0	0	0
15	SL	ST_3	D	0	0	0	142	0	0	0	0	0	0	0	0	0	0	0	0	0
15	SL	ST_4	D	0	0	0	245	0	0	0	0	0	0	0	0	0	0	0	0	0
15	SL	ST_5	D	0	0	0	322	0	0	0	42	0	0	0	0	0	0	0	0	0
15	SL	ST_6	D	0	0	654	142	0	0	0	0	0	0	0	0	0	0	0	0	0
15	SL	ST_7	D	0	117	0	169	0	0	0	36	0	0	0	0	0	0	0	0	0
15	SL	ST_8	D	0	0	0	47	0	0	0	15	0	0	0	0	0	0	0	0	0
15	SL	ST_9	D	0	0	0	373	0	0	0	10	0	0	0	0	0	0	0	0	0
16	FO	ST_1	D	0	0	0	0	0	0	0	27	0	0	0	0	0	0	0	0	0
16	FO	ST_10	D	0	0	0	0	0	0	0	10	0	0	0	0	0	0	0	0	0
16	FO	ST_2	D	0	0	13	0	0	0	0	68	14	0	0	0	0	0	0	0	0
16	FO	ST_3	D	0	0	0	0	0	0	0	22	0	0	0	0	0	0	0	0	0
16	FO	ST_4	D	0	0	0	0	0	0	0	14	0	0	0	0	0	0	0	0	0
16	FO	ST_5	D	0	0	0	0	0	0	0	109	0	0	0	0	0	0	0	0	0
16	FO	ST_6	D	0	0	0	0	0	0	0	33	0	0	0	0	0	0	0	0	0
16	FO	ST_7	D	0	0	0	0	0	0	0	22	0	0	0	0	0	0	0	0	0
16	FO	ST_8	D	0	0	0	26	0	0	0	13	0	0	0	0	0	0	0	0	0
16	FO	ST_9	D	0	0	0	0	0	0	0	47	0	0	0	0	0	0	0	0	0
16	Sl	ST_1	D	0	0	43	89	0	0	46	20	0	0	0	0	0	0	0	0	0
16	SL	ST_10	D	0	0	0	0	0	0	0	75	0	0	18	0	0	23	0	0	0
16	SL	ST_2	D	0	0	76	0	0	0	0	0	0	0	0	0	0	0	0	0	0
16	SL	ST_3	D	0	0	0	29	0	0	0	0	0	0	0	0	0	0	0	0	0
16	SL	ST_4	D	0	0	0	95	0	0	0	6	64	0	0	0	0	0	0	0	0
16	SL	ST_5	D	0	0	50	245	0	0	0	120	0	0	0	0	0	12	0	0	0
16	SL	ST_6	D	0	0	0	178	0	0	0	16	0	0	0	0	0	0	0	0	0
16	SL	ST_7	D	0	0	19	0	0	0	0	58	0	0	0	0	0	0	0	0	0
16	SL	ST_8	D	0	0	0	0	0	0	0	53	0	0	10	0	0	0	0	0	8
16	SL	ST_9	D	0	0	0	9	0	0	0	97	0	0	0	0	0	0	0	0	0

## Sheet: Doc
Field	Description
Site_no	Site number used to identify sites
SL_FO	Binary categorical variable. SL= SL transect; FO=forest transect
Sub_trn	Categorical variable representing 100 m transect segments.
TYPE_CD	Track type code. Categorical variable. A=approach; C=crossing; D=linear travel distance
bc	bobcat sum for all surveys
cu	cougar sum for all surveys
cy	coyote sum for all surveys
de	deer sum for all surveys
fi	fisher sum for all surveys
gb	grizzly bear sum for all surveys
gw	gray wolf sum for all surveys
ha	hare sum for all surveys
ly	lynx sum for all surveys
ma	marten sum for all surveys
mo_ek	moose/elk sum for all surveys
mu	mouse sum for all surveys
rf	red fox sum for all surveys
rs	red squirrel sum for all surveys
sh	shrew sum for all surveys
vo	vole sum for all surveys
we	weasel sum for all surveys
